# Supplementary material for: A new global grid-based weighted mean temperature model considering vertical nonlinear variation
Source: Copernicus journal article supplement (doi:10.5194/amt-14-2529-2021), 2021-03-31
Supplement: Supplementary file [file amt-14-2529-2021-supplement-title-page.pdf › amt-14-2529-2021-supplement-title-page.pdf]

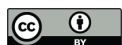

## *Supplement of*

# **A new global grid-based weighted mean temperature model considering vertical nonlinear variation**

**Peng Sun et al.**

*Correspondence to:* Suqin Wu ([sue.wu2018@gmail.com](mailto:sue.wu2018@gmail.com))

- [amt-14-2529-2021-supplement-title-page.pdf](#)
- [GGNTm.m](#)
- [example.m](#)
- [modelData.mat](#)

The copyright of individual parts of the supplement might differ from the article licence.
